# Supplementary material for: Molecular responses to salinity stress in Salix matsudana (Koidz) females and males
Source: Front Plant Sci. 2023 Jan 27;14:1122197. doi: 10.3389/fpls.2023.1122197 (PMC9911873; doi:10.3389/fpls.2023.1122197)
Supplement: Supplementary file 1 [file Table_1.xlsx]

## Sheet: Table S1
Table S1 Summary of RNA-seq data
Samples	Clean reads	Clean bases	GC Content	%≥Q30
CK-F-1	19604963	5878143068	0.4388	0.9139
CK-F-2	22856598	6847992968	0.4399	0.9023
CK-F-3	20313245	6086935326	0.4398	0.9065
CK-M-1	27771058	8323683982	0.4392	0.9073
CK-M-2	19877216	5957476100	0.44	0.9089
CK-M-3	20915088	6266232168	0.4402	0.92
T-F-1	24831858	7440999410	0.4419	0.9106
T-F-2	21908716	6565045740	0.4404	0.9066
T-F-3	21225573	6361855422	0.4398	0.9011
T-M-1	19468575	5829486198	0.4423	0.9118
T-M-2	21276275	6372963406	0.4416	0.9016
T-M-3	21540931	6450456884	0.4415	0.9094

## Sheet: Table S2
Table S2 Annotation of hub genes response to salinity stress in males and females
Gene ID	Sex preference	COG	GO_id	KEGG_id	KEGG_pathway	Pfam_annotation	Swiss-Prot_annotation	NR_annotation
EVM0040320	Female	Energy production and conversion	Biological Process: nitric oxide biosynthetic process (GO:0006809);; Molecular Function: heme binding (GO:0020037);; Molecular Function: molybdenum ion binding (GO:0030151);; Biological Process: nitrate assimilation (GO:0042128);; Molecular Function: molybdopterin cofactor binding (GO:0043546);; Molecular Function: nitrate reductase (NADPH) activity (GO:0050464);;	K10534|0.0e+00|pop:7463180|K10534 nitrate reductase (NAD(P)H) [EC:1.7.1.1 1.7.1.2 1.7.1.3] | (RefSeq) nitrate reductase [NADH]	Nitrogen metabolism (ko00910)	Mo-co oxidoreductase dimerisation domain	Nitrate reductase [NADH] OS=Cucurbita maxima OX=3661 PE=2 SV=1	hypothetical protein DKX38_002433 [Salix brachista]
EVM0040372	Female	Energy production and conversion	Biological Process: nitric oxide biosynthetic process (GO:0006809);; Molecular Function: heme binding (GO:0020037);; Molecular Function: molybdenum ion binding (GO:0030151);; Biological Process: nitrate assimilation (GO:0042128);; Molecular Function: molybdopterin cofactor binding (GO:0043546);; Molecular Function: nitrate reductase (NADPH) activity (GO:0050464);;	K10534|0.0e+00|pop:7469126|K10534 nitrate reductase (NAD(P)H) [EC:1.7.1.1 1.7.1.2 1.7.1.3] | (RefSeq) nitrate reductase [NADH]	Nitrogen metabolism (ko00910)	Mo-co oxidoreductase dimerisation domain	Nitrate reductase [NADH] OS=Cucurbita maxima OX=3661 PE=2 SV=1	hypothetical protein DKX38_008055 [Salix brachista]
EVM0029637	Female	Energy production and conversion	Molecular Function: oxidoreductase activity (GO:0016491);; Molecular Function: heme binding (GO:0020037);; Molecular Function: iron-sulfur cluster binding (GO:0051536);;	K00366|2.7e-300|pop:18097785|K00366 ferredoxin-nitrite reductase [EC:1.7.7.1] | (RefSeq) ferredoxin--nitrite reductase, chloroplastic	Nitrogen metabolism (ko00910)	Nitrite and sulphite reductase 4Fe-4S domain	Ferredoxin--nitrite reductase, chloroplastic OS=Betula pendula OX=3505 GN=NIR1 PE=2 SV=1	hypothetical protein DKX38_014303 [Salix brachista]
EVM0033874	Female	--	--	--	--	C2H2-type zinc finger	Zinc finger protein ZAT6 OS=Arabidopsis thaliana OX=3702 GN=ZAT6 PE=2 SV=1	hypothetical protein DKX38_002665 [Salix brachista]
EVM0050694	Female	Carbohydrate transport and metabolism	Molecular Function: channel activity (GO:0015267);; Cellular Component: integral component of membrane (GO:0016021);;	K09873|8.4e-121|pop:18094614|K09873 aquaporin TIP | (RefSeq) probable aquaporin TIP-type	--	Major intrinsic protein	Probable aquaporin TIP2-2 OS=Arabidopsis thaliana OX=3702 GN=TIP2-2 PE=1 SV=2	hypothetical protein DKX38_001307 [Salix brachista]
EVM0002056	Female	--	--	--	--	C2H2-type zinc finger	Zinc finger protein ZAT6 OS=Arabidopsis thaliana OX=3702 GN=ZAT6 PE=2 SV=1	hypothetical protein DKX38_020455 [Salix brachista]
EVM0013028	Female	Inorganic ion transport and metabolism	Cellular Component: plasma membrane (GO:0005886);; Cellular Component: plant-type vacuole membrane (GO:0009705);; Molecular Function: nitrate transmembrane transporter activity (GO:0015112);; Biological Process: nitrate transport (GO:0015706);; Biological Process: cellular response to nitrate (GO:0071249);;	K02575|2.6e-270|pop:7457764|K02575 MFS transporter, NNP family, nitrate/nitrite transporter | (RefSeq) high affinity nitrate transporter 2.5	Nitrogen metabolism (ko00910)	Major Facilitator Superfamily	High affinity nitrate transporter 2.5 OS=Arabidopsis thaliana OX=3702 GN=NRT2.5 PE=1 SV=1	high affinity nitrate transporter 2.5 [Populus trichocarpa]
EVM0022139	Female	--	Cellular Component: plasma membrane (GO:0005886);; Biological Process: response to nitrate (GO:0010167);; Biological Process: nitrate transport (GO:0015706);; Cellular Component: integral component of membrane (GO:0016021);; Biological Process: nitrate assimilation (GO:0042128);;	--	--	High-affinity nitrate transporter accessory	High-affinity nitrate transporter 3.2 OS=Arabidopsis thaliana OX=3702 GN=NRT3.2 PE=2 SV=1	hypothetical protein DKX38_022797 [Salix brachista]
EVM0022754	Female	--	Molecular Function: transcription factor activity, sequence-specific DNA binding (GO:0003700);; Cellular Component: nucleus (GO:0005634);; Molecular Function: sequence-specific DNA binding (GO:0043565);;	K18835|3.4e-18|spen:107016938|K18835 WRKY transcription factor 2 | (RefSeq) probable WRKY transcription factor 3	Plant-pathogen interaction (ko04626)	WRKY DNA -binding domain	Probable WRKY transcription factor 40 OS=Arabidopsis thaliana OX=3702 GN=WRKY40 PE=1 SV=1	hypothetical protein DKX38_004966 [Salix brachista]
EVM0032770	Female	--	Cellular Component: plasma membrane (GO:0005886);; Biological Process: response to nitrate (GO:0010167);; Biological Process: nitrate transport (GO:0015706);; Cellular Component: integral component of membrane (GO:0016021);; Biological Process: nitrate assimilation (GO:0042128);;	--	--	--	--	hypothetical protein DKX38_022797 [Salix brachista]
EVM0035125	Female	Inorganic ion transport and metabolism	Cellular Component: integral component of membrane (GO:0016021);; Molecular Function: transmembrane transporter activity (GO:0022857);;	K02575|1.8e-290|pop:7463308|K02575 MFS transporter, NNP family, nitrate/nitrite transporter | (RefSeq) high affinity nitrate transporter 2.4	Nitrogen metabolism (ko00910)	Major Facilitator Superfamily	High affinity nitrate transporter 2.4 OS=Arabidopsis thaliana OX=3702 GN=NRT2.4 PE=2 SV=1	hypothetical protein DKX38_013624 [Salix brachista]
EVM0000957	Female	--	Molecular Function: nicotianamine synthase activity (GO:0030410);; Biological Process: nicotianamine biosynthetic process (GO:0030418);;	K05953|8.0e-144|pop:18098035|K05953 nicotianamine synthase [EC:2.5.1.43] | (RefSeq) nicotianamine synthase	--	Nicotianamine synthase protein	Nicotianamine synthase OS=Solanum lycopersicum OX=4081 GN=CHLN PE=2 SV=1	hypothetical protein DKX38_006556 [Salix brachista]
EVM0018053	Female	--	Molecular Function: calcium ion binding (GO:0005509);;	K24345|1.9e-60|pop:7454390|K24345 calcium-binding protein KIC and related proteins | (RefSeq) calcium-binding protein PBP1	--	EF-hand domain pair	Calcium-binding protein KRP1 OS=Arabidopsis thaliana OX=3702 GN=KRP1 PE=2 SV=1	PREDICTED: calcium-binding protein PBP1-like [Populus euphratica]
EVM0025977	Female	--	Biological Process: reproduction (GO:0000003);; Molecular Function: regulatory region nucleic acid binding (GO:0001067);; Biological Process: response to acid chemical (GO:0001101);; Biological Process: developmental process involved in reproduction (GO:0003006);; Molecular Function: molecular_function (GO:0003674);; Molecular Function: nucleic acid binding (GO:0003676);; Molecular Function: DNA …	--	--	C2H2-type zinc finger	Zinc finger protein AZF2 OS=Arabidopsis thaliana OX=3702 GN=AZF2 PE=2 SV=1	hypothetical protein DKX38_014224 [Salix brachista]
EVM0035095	Female	--	Molecular Function: calcium ion binding (GO:0005509);;	K24345|3.5e-56|pop:7497418|K24345 calcium-binding protein KIC and related proteins | (RefSeq) calcium-binding protein PBP1	--	EF-hand domain pair	Calcium-binding protein KRP1 OS=Arabidopsis thaliana OX=3702 GN=KRP1 PE=2 SV=1	hypothetical protein DKX38_020269 [Salix brachista]
EVM0038596	Female	Inorganic ion transport and metabolism	Cellular Component: plasma membrane (GO:0005886);; Biological Process: cellular cadmium ion homeostasis (GO:0006876);; Biological Process: cellular iron ion homeostasis (GO:0006879);; Biological Process: cellular zinc ion homeostasis (GO:0006882);; Molecular Function: cation transmembrane transporter activity (GO:0008324);; Molecular Function: cadmium ion transmembrane transporter activity (GO:00…	--	--	Cation efflux family	Metal tolerance protein 10 OS=Arabidopsis thaliana OX=3702 GN=MTP10 PE=2 SV=1	metal tolerance protein 10 [Populus trichocarpa]
EVM0053199	Female	--	Molecular Function: calcium ion binding (GO:0005509);;	K24345|1.7e-38|pop:18095702|K24345 calcium-binding protein KIC and related proteins | (RefSeq) calcium-binding protein PBP1	--	EF-hand domain pair	Calcium-binding protein KRP1 OS=Arabidopsis thaliana OX=3702 GN=KRP1 PE=2 SV=1	hypothetical protein DKX38_025914 [Salix brachista]
EVM0004982	Female and Male	Carbohydrate transport and metabolism	Biological Process: carbohydrate metabolic process (GO:0005975);; Molecular Function: chitin binding (GO:0008061);;	K01183|2.8e-179|pop:18100581|K01183 chitinase [EC:3.2.1.14] | (RefSeq) class V chitinase	Amino sugar and nucleotide sugar metabolism (ko00520)	Glycosyl hydrolases family 18	Class V chitinase OS=Arabidopsis thaliana OX=3702 GN=ChiC PE=1 SV=1	hypothetical protein DKX38_010123 [Salix brachista]
EVM0007546	Female and Male	Secondary metabolites biosynthesis, transport and catabolism	Molecular Function: oxidoreductase activity (GO:0016491);; Molecular Function: metal ion binding (GO:0046872);;	K05933|6.6e-157|pop:7467861|K05933 aminocyclopropanecarboxylate oxidase [EC:1.14.17.4] | (RefSeq) 1-aminocyclopropane-1-carboxylate oxidase 5	Cysteine and methionine metabolism (ko00270)	2OG-Fe(II) oxygenase superfamily	1-aminocyclopropane-1-carboxylate oxidase OS=Musa acuminata OX=4641 GN=MAO1B PE=3 SV=1	hypothetical protein DKX38_002351 [Salix brachista]
EVM0012780	Female and Male	--	Biological Process: carbohydrate transport (GO:0008643);; Cellular Component: integral component of membrane (GO:0016021);;	K15382|6.9e-124|pop:7454742|K15382 solute carrier family 50 (sugar transporter) | (RefSeq) bidirectional sugar transporter SWEET12	--	Sugar efflux transporter for intercellular exchange	Bidirectional sugar transporter SWEET12 OS=Arabidopsis thaliana OX=3702 GN=SWEET12 PE=1 SV=1	hypothetical protein DKX38_022929 [Salix brachista]
EVM0020798	Female and Male	Energy production and conversion	Molecular Function: 3-chloroallyl aldehyde dehydrogenase activity (GO:0004028);; Biological Process: cellular aldehyde metabolic process (GO:0006081);;	K00128|1.5e-254|pop:7480051|K00128 aldehyde dehydrogenase (NAD+) [EC:1.2.1.3] | (RefSeq) aldehyde dehydrogenase family 3 member F1	Glycolysis / Gluconeogenesis (ko00010);; Ascorbate and aldarate metabolism (ko00053);; Fatty acid degradation (ko00071);; Valine, leucine and isoleucine degradation (ko00280);; Lysine degradation (ko00310);; Arginine and proline metabolism (ko00330);; Histidine metabolism (ko00340);; Tryptophan metabolism (ko00380);; beta-Alanine metabolism (ko00410);; Glycerolipid metabolism (ko00561);; Pyruvate…	Aldehyde dehydrogenase family	Aldehyde dehydrogenase family 3 member F1 OS=Arabidopsis thaliana OX=3702 GN=ALDH3F1 PE=2 SV=2	aldehyde dehydrogenase family 3 member F1 [Populus trichocarpa]
EVM0021401	Female and Male	Secondary metabolites biosynthesis, transport and catabolism	Molecular Function: oxidoreductase activity (GO:0016491);; Molecular Function: metal ion binding (GO:0046872);;	K05933|4.2e-170|pop:7469176|K05933 aminocyclopropanecarboxylate oxidase [EC:1.14.17.4] | (RefSeq) 1-aminocyclopropane-1-carboxylate oxidase 5	Cysteine and methionine metabolism (ko00270)	2OG-Fe(II) oxygenase superfamily	1-aminocyclopropane-1-carboxylate oxidase 5 OS=Arabidopsis thaliana OX=3702 GN=At1g77330 PE=2 SV=1	hypothetical protein DKX38_008138 [Salix brachista]
EVM0021406	Female and Male	General function prediction only	Molecular Function: alcohol dehydrogenase activity, zinc-dependent (GO:0004024);; Cellular Component: cytosol (GO:0005829);; Molecular Function: zinc ion binding (GO:0008270);; Biological Process: formaldehyde catabolic process (GO:0046294);; Molecular Function: S-(hydroxymethyl)glutathione dehydrogenase activity (GO:0051903);;	K18857|2.3e-185|pop:7485070|K18857 alcohol dehydrogenase class-P [EC:1.1.1.1] | (RefSeq) alcohol dehydrogenase	Glycolysis / Gluconeogenesis (ko00010);; Fatty acid degradation (ko00071);; Tyrosine metabolism (ko00350);; alpha-Linolenic acid metabolism (ko00592)	Alcohol dehydrogenase GroES-like domain	Alcohol dehydrogenase OS=Malus domestica OX=3750 GN=ADH PE=2 SV=1	PREDICTED: alcohol dehydrogenase [Populus euphratica]
EVM0025296	Female and Male	--	Cellular Component: plasma membrane (GO:0005886);; Molecular Function: peptide:proton symporter activity (GO:0015333);; Cellular Component: integral component of membrane (GO:0016021);; Molecular Function: oligopeptide transmembrane transporter activity (GO:0035673);; Molecular Function: peptide transmembrane transporter activity (GO:1904680);;	K14638|2.5e-208|lsv:111891766|K14638 solute carrier family 15 (peptide/histidine transporter), member 3/4 | (RefSeq) protein NRT1/ PTR FAMILY 3.1-like	--	POT family	Protein NRT1/ PTR FAMILY 3.1 OS=Arabidopsis thaliana OX=3702 GN=NPF3.1 PE=2 SV=1	hypothetical protein POPTR_006G034000 [Populus trichocarpa]
EVM0030049	Female and Male	--	Molecular Function: iron ion binding (GO:0005506);; Cellular Component: cytoplasm (GO:0005737);; Biological Process: inositol catabolic process (GO:0019310);; Molecular Function: inositol oxygenase activity (GO:0050113);;	K00469|4.4e-144|pop:7471467|K00469 inositol oxygenase [EC:1.13.99.1] | (RefSeq) inositol oxygenase 1	Ascorbate and aldarate metabolism (ko00053);; Inositol phosphate metabolism (ko00562)	Myo-inositol oxygenase	Inositol oxygenase 1 OS=Arabidopsis thaliana OX=3702 GN=MIOX1 PE=2 SV=1	hypothetical protein DKX38_013050 [Salix brachista]
EVM0049603	Female and Male	Carbohydrate transport and metabolism	Molecular Function: polygalacturonase activity (GO:0004650);; Cellular Component: extracellular region (GO:0005576);; Biological Process: carbohydrate metabolic process (GO:0005975);; Biological Process: cell wall organization (GO:0071555);;	K01184|5.8e-201|pop:18102670|K01184 polygalacturonase [EC:3.2.1.15] | (RefSeq) polygalacturonase	Pentose and glucuronate interconversions (ko00040)	Glycosyl hydrolases family 28	Polygalacturonase OS=Prunus persica OX=3760 PE=2 SV=1	hypothetical protein DKX38_016141 [Salix brachista]
EVM0052310	Male	Nucleotide transport and metabolism	Molecular Function: dihydrofolate reductase activity (GO:0004146);; Molecular Function: thymidylate synthase activity (GO:0004799);; Cellular Component: mitochondrion (GO:0005739);; Cellular Component: cytosol (GO:0005829);; Biological Process: dTMP biosynthetic process (GO:0006231);; Biological Process: one-carbon metabolic process (GO:0006730);; Biological Process: methylation (GO:0032259);; Bi…	K13998|5.1e-301|pop:7470002|K13998 dihydrofolate reductase / thymidylate synthase [EC:1.5.1.3 2.1.1.45] | (RefSeq) bifunctional dihydrofolate reductase-thymidylate synthase 1	Pyrimidine metabolism (ko00240);; One carbon pool by folate (ko00670);; Folate biosynthesis (ko00790)	Thymidylate synthase	Bifunctional dihydrofolate reductase-thymidylate synthase OS=Glycine max OX=3847 PE=1 SV=1	bifunctional dihydrofolate reductase-thymidylate synthase 1 [Populus trichocarpa]
EVM0055050	Male	Posttranslational modification, protein turnover, chaperones	Molecular Function: structural constituent of ribosome (GO:0003735);; Cellular Component: nucleus (GO:0005634);; Cellular Component: cytoplasm (GO:0005737);; Cellular Component: ribosome (GO:0005840);; Biological Process: translation (GO:0006412);; Biological Process: protein ubiquitination (GO:0016567);; Biological Process: modification-dependent protein catabolic process (GO:0019941);; Molecula…	K02927|8.1e-45|dcr:108206306|K02927 ubiquitin-large subunit ribosomal protein L40e | (RefSeq) ubiquitin-60S ribosomal protein L40	Ribosome (ko03010);; Ubiquitin mediated proteolysis (ko04120)	Ubiquitin family	Ubiquitin-60S ribosomal protein L40 OS=Nicotiana sylvestris OX=4096 GN=UBICEP52-7 PE=2 SV=2	60S ribosomal protein L40 [Klebsormidium nitens]
EVM0020026	Male	Posttranslational modification, protein turnover, chaperones	Biological Process: response to acid chemical (GO:0001101);; Biological Process: response to oomycetes (GO:0002239);; Biological Process: immune system process (GO:0002376);; Molecular Function: molecular_function (GO:0003674);; Molecular Function: catalytic activity (GO:0003824);; Molecular Function: glutathione transferase activity (GO:0004364);; Molecular Function: binding (GO:0005488);; Molec…	K00799|3.5e-107|pop:18109626|K00799 glutathione S-transferase [EC:2.5.1.18] | (RefSeq) glutathione S-transferase F6	Glutathione metabolism (ko00480)	Glutathione S-transferase, N-terminal domain	Glutathione S-transferase F3 OS=Arabidopsis thaliana OX=3702 GN=GSTF3 PE=2 SV=1	hypothetical protein DKX38_003228 [Salix brachista]
EVM0028501	Male	Translation, ribosomal structure and biogenesis	Molecular Function: structural constituent of ribosome (GO:0003735);; Cellular Component: ribosome (GO:0005840);; Biological Process: translation (GO:0006412);;	K02991|8.1e-132|pop:7461688|K02991 small subunit ribosomal protein S6e | (RefSeq) 40S ribosomal protein S6	Ribosome (ko03010)	Ribosomal protein S6e	40S ribosomal protein S6 OS=Asparagus officinalis OX=4686 GN=rps6 PE=2 SV=1	40S ribosomal protein S6 [Populus trichocarpa]
EVM0002851	Male	Translation, ribosomal structure and biogenesis	Molecular Function: structural constituent of ribosome (GO:0003735);; Cellular Component: ribosome (GO:0005840);; Biological Process: translation (GO:0006412);;	K02870|4.2e-84|pop:18107840|K02870 large subunit ribosomal protein L12e | (RefSeq) 60S ribosomal protein L12	Ribosome (ko03010)	Ribosomal protein L11, N-terminal domain	60S ribosomal protein L12 OS=Prunus armeniaca OX=36596 GN=RPL12 PE=2 SV=1	hypothetical protein DKX38_028677 [Salix brachista]
EVM0041455	Male	Translation, ribosomal structure and biogenesis	Biological Process: ribosomal small subunit assembly (GO:0000028);; Molecular Function: RNA binding (GO:0003723);; Molecular Function: structural constituent of ribosome (GO:0003735);; Biological Process: translation (GO:0006412);; Cellular Component: cytosolic small ribosomal subunit (GO:0022627);;	K02958|3.4e-80|pop:7471994|K02958 small subunit ribosomal protein S15e | (RefSeq) 40S ribosomal protein S15	Ribosome (ko03010)	Ribosomal protein S19	40S ribosomal protein S15 OS=Oryza sativa subsp. japonica OX=39947 GN=RPS15 PE=2 SV=2	40S ribosomal protein S15 [Populus trichocarpa]
EVM0028989	Male	--	Molecular Function: structural constituent of ribosome (GO:0003735);; Cellular Component: ribosome (GO:0005840);; Biological Process: translation (GO:0006412);;	K02924|1.4e-23|cmos:111462968|K02924 large subunit ribosomal protein L39e | (RefSeq) uncharacterized protein LOC111462968	Ribosome (ko03010)	Ribosomal L39 protein	60S ribosomal protein L39-1 OS=Oryza sativa subsp. japonica OX=39947 GN=RPL39A PE=3 SV=2	hypothetical protein C4D60_Mb09t12070 [Musa balbisiana]
EVM0007883	Male	--	Molecular Function: structural constituent of ribosome (GO:0003735);; Cellular Component: ribosome (GO:0005840);; Biological Process: translation (GO:0006412);;	K02971|1.5e-39|pop:7481738|K02971 small subunit ribosomal protein S21e | (RefSeq) 40S ribosomal protein S21-2	Ribosome (ko03010)	Ribosomal protein S21e	40S ribosomal protein S21-2 OS=Arabidopsis thaliana OX=3702 GN=RPS21C PE=1 SV=2	hypothetical protein DKX38_007127 [Salix brachista]
EVM0036742	Male	--	--	K02947|6.1e-50|pop:18098840|K02947 small subunit ribosomal protein S10e | (RefSeq) 40S ribosomal protein S10-1	Ribosome (ko03010)	Plectin/S10 domain	40S ribosomal protein S10-1 OS=Arabidopsis thaliana OX=3702 GN=RPS10A PE=1 SV=1	40S ribosomal protein S10-1-like [Populus alba]
EVM0052925	Male	Amino acid transport and metabolism;; Coenzyme transport and metabolism	Biological Process: branched-chain amino acid biosynthetic process (GO:0009082);; Molecular Function: L-leucine transaminase activity (GO:0052654);; Molecular Function: L-valine transaminase activity (GO:0052655);; Molecular Function: L-isoleucine transaminase activity (GO:0052656);;	K00826|3.6e-203|pop:7467241|K00826 branched-chain amino acid aminotransferase [EC:2.6.1.42] | (RefSeq) branched-chain-amino-acid aminotransferase 2, chloroplastic isoform X1	Cysteine and methionine metabolism (ko00270);; Valine, leucine and isoleucine degradation (ko00280);; Valine, leucine and isoleucine biosynthesis (ko00290);; Pantothenate and CoA biosynthesis (ko00770);; Glucosinolate biosynthesis (ko00966);; 2-Oxocarboxylic acid metabolism (ko01210);; Biosynthesis of amino acids (ko01230)	Amino-transferase class IV	Branched-chain-amino-acid aminotransferase 2, chloroplastic OS=Arabidopsis thaliana OX=3702 GN=BCAT2 PE=1 SV=1	hypothetical protein DKX38_002628 [Salix brachista]
EVM0019781	Male	--	--	--	--	CBS domain	Sucrose nonfermenting 4-like protein OS=Arabidopsis thaliana OX=3702 GN=SNF4 PE=1 SV=1	hypothetical protein DKX38_019380 [Salix brachista]
EVM0014503	Male	Translation, ribosomal structure and biogenesis	Molecular Function: structural constituent of ribosome (GO:0003735);; Cellular Component: ribosome (GO:0005840);; Biological Process: translation (GO:0006412);;	K02915|2.4e-57|pop:7495969|K02915 large subunit ribosomal protein L34e | (RefSeq) 60S ribosomal protein L34	Ribosome (ko03010)	Ribosomal protein L34e	60S ribosomal protein L34 OS=Nicotiana tabacum OX=4097 GN=RPL34 PE=2 SV=1	hypothetical protein DKX38_027022 [Salix brachista]
EVM0053306	Male	--	Biological Process: telomere maintenance (GO:0000723);; Biological Process: double-strand break repair via homologous recombination (GO:0000724);; Cellular Component: nuclear chromosome, telomeric region (GO:0000784);; Molecular Function: damaged DNA binding (GO:0003684);; Molecular Function: single-stranded DNA binding (GO:0003697);; Cellular Component: DNA replication factor A complex (GO:00056…	K07466|1.5e-129|pop:112326066|K07466 replication factor A1 | (RefSeq) uncharacterized protein LOC112326066	DNA replication (ko03030);; Nucleotide excision repair (ko03420);; Mismatch repair (ko03430);; Homologous recombination (ko03440)	Replication protein A OB domain	--	uncharacterized protein LOC118036087 [Populus alba]
EVM0043816	Male	Replication, recombination and repair	Molecular Function: single-stranded DNA binding (GO:0003697);; Molecular Function: endonuclease activity (GO:0004519);; Cellular Component: nucleus (GO:0005634);; Biological Process: nucleotide-excision repair (GO:0006289);;	K10846|0.0e+00|pop:18107274|K10846 DNA excision repair protein ERCC-5 | (RefSeq) DNA repair protein UVH3 isoform X1	Nucleotide excision repair (ko03420)	XPG N-terminal domain	DNA repair protein UVH3 OS=Arabidopsis thaliana OX=3702 GN=UVH3 PE=2 SV=1	hypothetical protein DKX38_026820 [Salix brachista]
EVM0038529	Male	0	Molecular Function: protein kinase activity (GO:0004672);; Molecular Function: ATP binding (GO:0005524);; Cellular Component: integral component of membrane (GO:0016021);;	K13430|1.1e-46|peq:110033478|K13430 serine/threonine-protein kinase PBS1 [EC:2.7.11.1] | (RefSeq) probable serine/threonine-protein kinase PBL7 isoform X1	Plant-pathogen interaction (ko04626)	Protein kinase domain	Rust resistance kinase Lr10 OS=Triticum aestivum OX=4565 GN=LRK10 PE=2 SV=1	rust resistance kinase Lr10 [Populus trichocarpa]
EVM0030023	Male	Intracellular trafficking, secretion, and vesicular transport	Molecular Function: GTPase activity (GO:0003924);; Molecular Function: GTP binding (GO:0005525);; Biological Process: SRP-dependent cotranslational protein targeting to membrane (GO:0006614);; Molecular Function: 7S RNA binding (GO:0008312);; Cellular Component: signal recognition particle (GO:0048500);;	K03106|1.5e-41|pop:7465265|K03106 signal recognition particle subunit SRP54 [EC:3.6.5.4] | (RefSeq) signal recognition particle 54 kDa protein, chloroplastic	Protein export (ko03060)	SRP54-type protein, helical bundle domain	Signal recognition particle 54 kDa protein, chloroplastic OS=Arabidopsis thaliana OX=3702 GN=FFC PE=1 SV=1	hypothetical protein DKX38_024054 [Salix brachista]
EVM0004190	Male	Nucleotide transport and metabolism	Biological Process: deoxyribonucleotide biosynthetic process (GO:0009263);; Molecular Function: oxidoreductase activity (GO:0016491);;	K10808|3.4e-186|pop:7456235|K10808 ribonucleoside-diphosphate reductase subunit M2 [EC:1.17.4.1] | (RefSeq) ribonucleoside-diphosphate reductase small chain	Purine metabolism (ko00230);; Pyrimidine metabolism (ko00240);; Glutathione metabolism (ko00480)	Ribonucleotide reductase, small chain	Ribonucleoside-diphosphate reductase small chain OS=Nicotiana tabacum OX=4097 PE=2 SV=1	PREDICTED: ribonucleoside-diphosphate reductase small chain [Populus euphratica]
EVM0050908	Male	Energy production and conversion	Molecular Function: oxidoreductase activity, acting on the aldehyde or oxo group of donors, NAD or NADP as acceptor (GO:0016620);;	K00131|5.3e-284|pop:7493404|K00131 glyceraldehyde-3-phosphate dehydrogenase (NADP+) [EC:1.2.1.9] | (RefSeq) NADP-dependent glyceraldehyde-3-phosphate dehydrogenase isoform X2	Glycolysis / Gluconeogenesis (ko00010);; Pentose phosphate pathway (ko00030);; Carbon metabolism (ko01200)	Aldehyde dehydrogenase family	NADP-dependent glyceraldehyde-3-phosphate dehydrogenase OS=Nicotiana plumbaginifolia OX=4092 GN=GAPN PE=2 SV=1	hypothetical protein DKX38_028424 [Salix brachista]
EVM0018244	Male	--	Molecular Function: nucleic acid binding (GO:0003676);;	K14525|7.3e-51|dosa:Os04t0428950-00|K14525 ribonucleases P/MRP protein subunit RPP25 [EC:3.1.26.5] | (RefSeq) Os04g0428950; Similar to Ribonuclease P.	Ribosome biogenesis in eukaryotes (ko03008);; RNA transport (ko03013)	Alba	--	uncharacterized protein LOC7493993 isoform X1 [Populus trichocarpa]
EVM0024257	Male	Posttranslational modification, protein turnover, chaperones	Cellular Component: cytoplasm (GO:0005737);; Biological Process: glycerol ether metabolic process (GO:0006662);; Molecular Function: protein disulfide oxidoreductase activity (GO:0015035);; Molecular Function: oxidoreductase activity, acting on a sulfur group of donors, disulfide as acceptor (GO:0016671);; Biological Process: cell redox homeostasis (GO:0045454);; Molecular Function: protein-disul…	K03671|2.9e-100|pop:18110549|K03671 thioredoxin 1 | (RefSeq) uncharacterized protein LOC18110549	--	Thioredoxin	Thioredoxin M2, chloroplastic OS=Arabidopsis thaliana OX=3702 GN=TRXM2 PE=1 SV=2	uncharacterized protein LOC18110549 [Populus trichocarpa]
EVM0056607	Male	--	Molecular Function: nucleotide binding (GO:0000166);; Molecular Function: catalytic activity (GO:0003824);; Biological Process: DNA-templated transcription, initiation (GO:0006352);; Cellular Component: RNA polymerase complex (GO:0030880);;	K03012|1.2e-59|pop:18105995|K03012 DNA-directed RNA polymerase II subunit RPB4 | (RefSeq) DNA-directed RNA polymerases IV and V subunit 4	RNA polymerase (ko03020)	--	DNA-directed RNA polymerases IV and V subunit 4 OS=Arabidopsis thaliana OX=3702 GN=NRPD4 PE=1 SV=2	PREDICTED: DNA-directed RNA polymerases IV and V subunit 4 isoform X1 [Populus euphratica]
EVM0001693	Male	General function prediction only	Biological Process: mRNA splicing, via spliceosome (GO:0000398);; Cellular Component: Prp19 complex (GO:0000974);; Biological Process: DNA repair (GO:0006281);; Molecular Function: ubiquitin protein ligase activity (GO:0061630);;	K10599|3.6e-250|pop:7459990|K10599 pre-mRNA-processing factor 19 [EC:2.3.2.27] | (RefSeq) pre-mRNA-processing factor 19 homolog 2	Spliceosome (ko03040);; Ubiquitin mediated proteolysis (ko04120)	Prp19/Pso4-like	Pre-mRNA-processing factor 19 OS=Oryza sativa subsp. japonica OX=39947 GN=PRP19 PE=2 SV=1	pre-mRNA-processing factor 19 homolog 2-like [Populus alba]
